# Supplementary material
Source: publisher figshare collection journal article supplement (https://karger.figshare.com/ndownloader/files/20322273)
Supplement: Supplementary file 1 [file 20322273]

## SUPPLEMENTAL MATERIALS AND METHODS

### *DNA extraction*

Blood samples (10 ml) were collected from each individual into the ethylenediaminetetraacetic acid tubes. The peripheral blood mononuclear cells (PBMC) were separated and genomic DNA extracted using the QIAamp DNA Blood Midi Kit (Qiagen, Valencia, CA) according to the manufacturer's protocol.

### *Bioinformatical analysis and whole-genome exon sequencing*

Genomic DNA was extracted from peripheral EDTA-anticoagulated blood samples by QIAamp DNA Blood Mini Kit (Qiagen). Exon libraries were prepared by KAPA HTP Library Preparation Kit and IDT Whole Exome and sequenced using paired-end, 150-cycle chemistry on the Illumina Sequencing platform (Illumina, San Diego, CA). The sequencing data were aligned to the reference human genome (GRCh37/hg19) using BWA and variant calls were generated using GATK tools. Each samples have the variants ranging from 271,229 to 328,220. Variants were then filtered based on family history (occur in all persons with disease but not in healthy individuals). The resulting variants (15,926) were further filtered for missense variants and predicted to be damaging or deleterious by PolyPhen-2 ( $>0.45$ ) and SIFT ( $<0.05$ ). Finally, we achieved 129 missense variants that predicted to be damaging or deleterious. Nonsense mutations were selected but not considered because only two genes (BX088651.1 and PABPC3) with nonsense mutations and they are unknown (BX088651.1) or rarely reported (PABPC3). We used DAVID Function Annotation to characterize these variant genes, and observed DMBT1 is belonged to OMIM\_disease category related to Medulloblastoma.

### *Sanger sequencing*

The identified missense variants (such as the DMBT1 mutation) were validated using Sanger sequencing for all subjects on an ABI3730 (Applied Biosystems, Foster city, CA, USA) using a standard Sanger sequencing protocol. The PCR primers used for amplification of DMBT1 coding sequence were 5'-CCCAATACTTGAGCTTCCA-3' and 5'-ACACCAGCGTCTTCGTGAT-3'.

### *DMBT1 siRNA and transient transfection*

To knockdown DMBT1 expression in thyroid cancer cell lines, we obtained separate plasmids containing two DMBT1 siRNAs and a negative control siRNA from Biotend (Shanghai, China) and then transiently transfected these constructs into thyroid cancer cells using Lipofectamine 3000 (Invitrogen, Shanghai, China) according to the manufacturers' instructions. In brief, cells were grown in 6-wells plates and transiently transfected with 50 nmol/L of siRNA for 48 h and efficiency of DMBT1 knockdown was verified by using qRT-PCR and Western blot.

### *Construction of plasmids carrying wild type and mutant DMBT1 cDNA and gene transfection*

Plasmids carrying wild type and mutant DMBT1 cDNA were constructed by using PCR, gene cloning, amplification, and DNA-sequencing with standard gene cloning technologies. Specifically, we first amplified three DMBT1 cDNA fragments (1a, 1703 bp; 1b, 1413 bp; and 2, 2242 bp) using PCR and the primer sequences were

1a, 5'-AGAAGATTCTAGAGCTAGCGATGGGCATTTCCACAGTGAT-3' and  
 5'-AGGACAGCTCCACAGATAGCTCTCGTGGCCGGAACATCT-3'; 1b,  
 5'-AGATGTTCCGGCCACGAGAGCTATCTGTGGAGCTGTCCT-3' and  
 5'-CCTATACAGCACCTCCACT-3'; and 2,  
 5'-AGTGGAGGTGCTGTATAGGGGCAGCTGGGGAACCGTGTGCGACGACAG  
 CTGGGACACCAATGATG-3' and  
 5'-GCAGATCCTTCGCGGCCGCGCTACCGAGGCTCCTCTTCTC-3'. We then  
 inserted them into a pCDH3.1 vector to obtain pCDH3.1-DMBT1 carrying the  
 recombinant human DMBT1 cDNA by using the pEASY-Uni Seamless Cloning and  
 Assembly Kit (Transgen Biotech, Shanghai, China) according to the manufacturer's  
 protocol. Furthermore, we also performed a site directed mutagenesis to  
 obtain mutant *DMBT1* D1657E using the Mut Express II Fast Mutagenesis Kit V2  
 (Vazyme, Nanjing, China). The primers used for site-directed mutagenesis were  
 5'-TGTGCGACGAAAGCTGGGACACCAATGATGCCAATGTGGTCT-3' and  
 5'-TGTCCCAGCTTTCGTCGCACACGGTTCCTCCAGCTGCCCCTA-3'.

After that, cells growing in 6-wells plates were transfected with 2 µg of wild type  
 or mutant plasmid DNA using Lipofectamine 3000 (Invitrogen) for 48 h and then  
 assayed for DMBT1 expression using qRT-PCR and Western blot.

#### *Cell lines and culture*

Human medullary thyroid cancer cell line TT, human anaplastic thyroid cancer  
 cell line Cal62, and human squamous thyroid cancer cell line SW579 were obtained  
 from The Cell Bank of Type Culture Collection of Chinese Academy of Sciences

(Shanghai, China). Human papillary thyroid cancer cell line TPC-1 and human follicular thyroid cancer cell line FTC133 were obtained from The Cell Bank of University of Colorado Cancer Center (Denver, Colorado, USA). Cal62 cells were grown in Dulbecco's modified Eagle's medium (DMEM) supplemented with 10% fetal bovine serum (FBS), 1% penicillin-streptomycin (10,000 units penicillin, and 10  $\mu$ g streptomycin per mL in 0.9% NaCl). SW579, TPC-1, TT, and FTC133 were grown in L-15, RPMI-1640, F12K, DMEM/F12 supplemented with 10% FBS, 1% penicillin-streptomycin in a humidified incubator with 5% CO<sub>2</sub> at 37°C.

#### *RNA isolation and qRT-PCR*

Total RNA was isolated using Trizol reagent (Invitrogen) and 1  $\mu$ g each of these total RNA samples was reversely transcribed into cDNA using the PrimeScript™ RT reagent kit (Takara, Dalian, China). Amplicons were then amplified in triplicate using the SYBR Premix Ex Taq™ kit (Takara) according to the manufacturer's instructions. The primer used for DMBT1 were 5'-GCAGTCCCCTCTCATTGCT-3' and 5'-AGCAGGTTGGTGCTGTCATT-3' and  $\beta$ -actin primers were 5'-TGACGTGGACATCCGCAAAG-3' and 5'-CTGGAAGGTGGACAGCGAGG-3'. The house keeping gene  $\beta$ -actin was used as internal control. The threshold cycle (Ct) values were analyzed using the comparative Ct (2- $\Delta\Delta$ Ct) method to calculate relative level of DMBT1 mRNA.

### *Western blot*

Total cellular protein was extracted from  $1 \times 10^6$  cultured cells using the ProteoJET Mammalian Cell Lysis Reagent (Fermentas Inc., Thermo, Waltham, MA, USA) containing phenylmethanesulfonyl fluoride (Roche, Indianapolis, IN, USA); and PhosSTOP (Roche). After quantitation, 20  $\mu\text{g}$  of each protein sample was separated in 8% sodium dodecyl sulfate-polyacrylamide gel electrophoresis (SDS-PAGE) gel and transferred on to polyvinylidene fluoride membranes (PVDF; Millipore, Billerica, MA, USA). After blocking in 5% nonfat milk solution in phosphate buffered saline (PBS)-Tween 20 (PBS-T), the membranes were incubated with an antibody against human DMBT1 (1:500; Abcam, Cambridge, MA, USA) or GAPDH (1:5000; Abcam) and then subsequently incubated with goat anti-rabbit or anti-mouse IgG (1:5000; Jackson ImmunoResearch Laboratories, Shanghai, China). Protein bands were visualized using the enhanced chemiluminescence reagents (Thermo Fisher Scientific) or the 1-step<sup>TM</sup> NBT/BCIP reagent (Thermo Fisher Scientific) and detected by the Alpha Imager (Alpha Innotech, San Leandro, CA, USA).

### *Cell viability CCK8 assay*

Cell viability after gene transfection was measured using the cell viability Cell Counting Kit-8 (CCK8; Dojindo Molecular Technologies, Gaithersburg, Maryland, USA). Briefly, cells were seeded into 96-well plates at  $5 \times 10^3$  cells/well and grown up to different test time. Next, 10  $\mu\text{l}$  of CCK-8 solution was added to each well and

further cultured for 4 h at 37°C and then optical density numbers were measured using a spectrophotometer (BioTek, Shanghai, China) at 450 nm. The experiments were conducted in five wells and repeated at least three times.

#### *5-ethynyl-20-deoxyuridine incorporation assay*

To assess cell proliferation, we performed the 5-ethynyl-20-deoxyuridine (EdU) incorporation assay using a kit from Ribobio (Shanghai, China). In particular, transfected tumor cells were grown overnight and then switched to a growth medium containing 50  $\mu$ M EdU and cultured for 2 h at 37 °C. After that, cells were fixed in 4% formaldehyde at room temperature for 15 min and then incubated in 0.5% Triton X-100 at room temperature for 20 min. Cells were then washed in PBS three times and incubated with 100  $\mu$ l of 1 x Apollo<sup>®</sup> reaction cocktail for 30 min in the dark at the room temperature. Subsequently, the EdU-positive cells were analyzed by a flow cytometer (BD Biosciences, Franklin Lakes, NJ, USA).

#### *Cell migration assay*

Cells were grown and transiently transfected with DMBT1 cDNA, siRNA, or mutated DMBT1 cDNA for 48 h and then  $1 \times 10^4$  cells in 100  $\mu$ l FBS-free culture medium were added into the chambers of 8  $\mu$ m pore size (BD, Shanghai, China), while the bottom chambers were filled with 600  $\mu$ l growth medium supplemented with 20% FBS. The cells were then cultured at 37°C for 24 h. The cells that migrated into the reverse side of the inserts were then fixed in 4% formaldehyde at room

temperature for 30 min and stained with 0.05% crystal violet for 30 min. After, images of the migrated cells were captured under a light microscope and the migrated cells were counted and quantified.

#### *Flow cytometric cell cycle distribution assay*

After gene transfection, cells were harvested in ice-cold PBS and fixed in 70% ethanol for treatment with RNase (2 µg/ml) at 37°C for 30 min. Cells were then stained with 400 µl propidium iodide (PI; 10 µg/ml) for 40 min at room temperature. The cells were determined for DNA content using the FACS Calibur flow cytometer (BD Biosciences, Franklin Lakes, NJ, USA) for cell cycle distribution.

#### *Statistical analysis*

*In vitro* data were summarized as the mean  $\pm$  SEM of at least triplicate experiments and statistically analyzed using GraphPad Prism 5.1 (GraphPad Software, La Jolla, CA, USA). For comparison among the groups, we used a Student's *t* test or one- or two-way analysis of variance (ANOVA). A  $p < 0.05$  was defined as statistically significant at  $*p < 0.05$ ,  $**p < 0.01$ , or  $***p < 0.001$  level.

Alteration freq

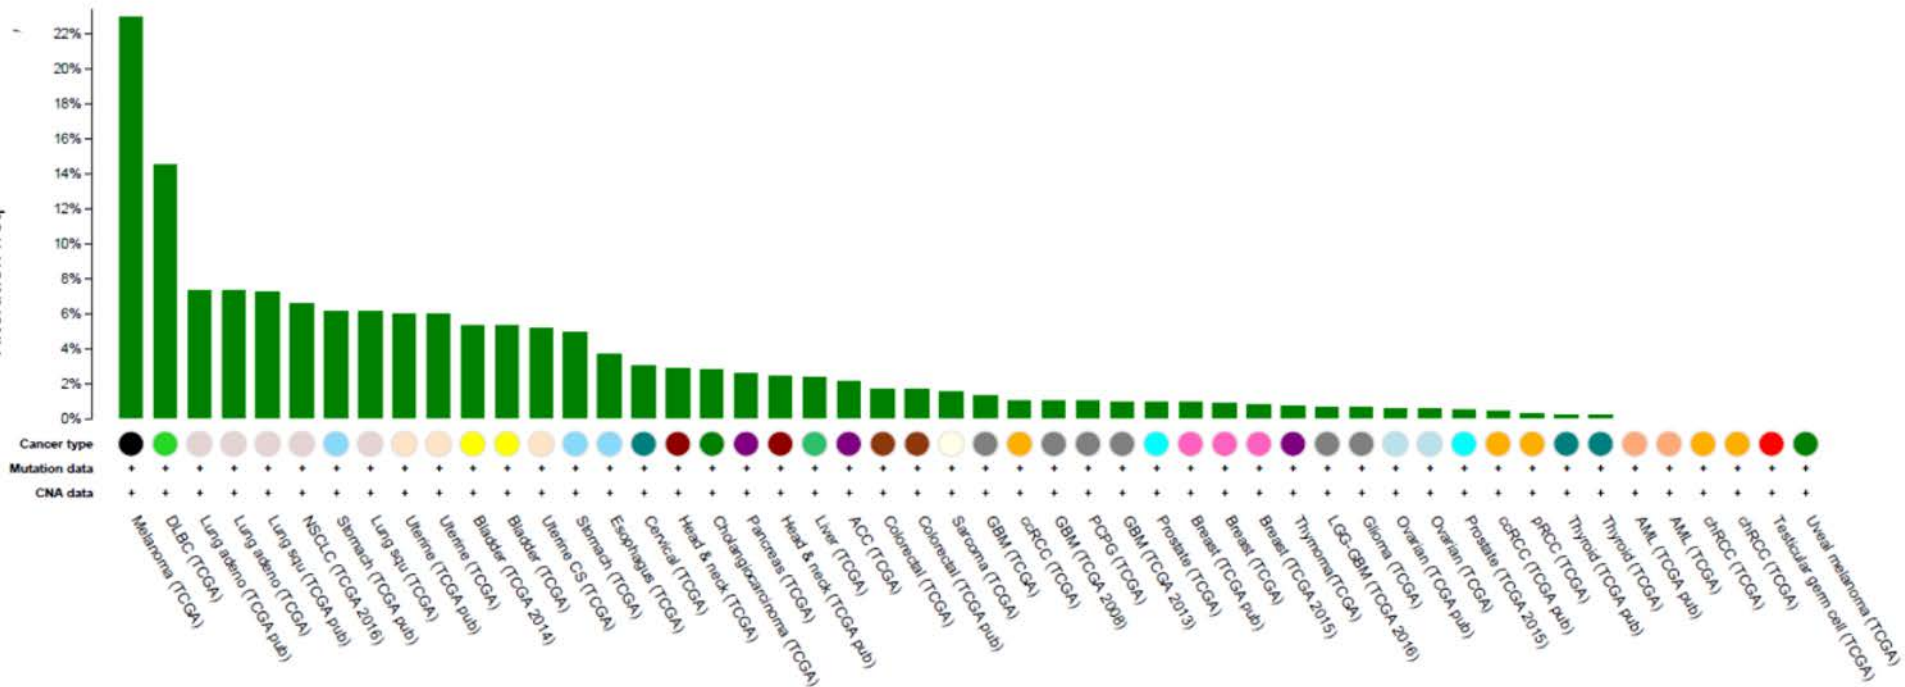

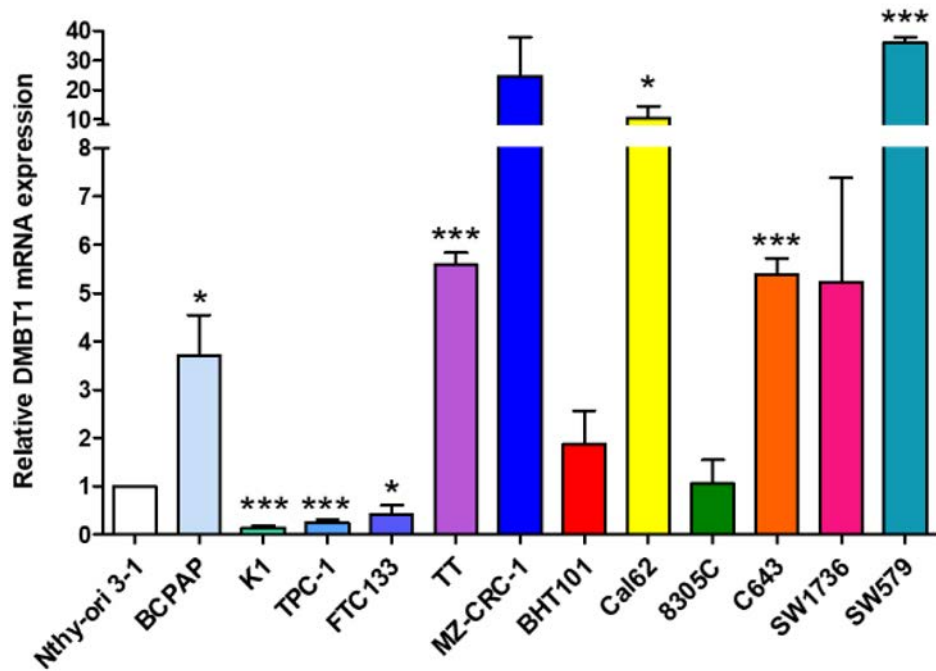



*SupplementalTable S1.* Demographic and clinical data of all family members with DMBT1 p.D1657E mutation.

| Subject    | Sex    | Age (years) | Diagnosis                                  |
|------------|--------|-------------|--------------------------------------------|
| Pedigree 1 |        |             |                                            |
| II-5       | Male   | 69          | Familiar Mediastinal Neuroendocrine Cancer |
| III-2      | Female | 38          | Familiar Mediastinal Neuroendocrine Cancer |
| III-8      | Female | 44          | Familiar Mediastinal Neuroendocrine Cancer |
| III-9      | Male   | 35          | Familiar Mediastinal Neuroendocrine Cancer |
| IV-1       | Female | 22          | None                                       |
| IV-3       | Female | 2           | None                                       |
| Pedigree 2 |        |             |                                            |
| III-3      | Female | 55          | Familiar Mediastinal Neuroendocrine Cancer |
| III-5      | Female | 52          | Familiar Mediastinal Neuroendocrine Cancer |
| III-7      | Female | 48          | None                                       |
| III-11     | Female | 48          | None                                       |
| IV-1       | Male   | 26          | None                                       |
| IV-4       | Male   | 25          | None                                       |

*Supplemental Table S2.* DNA sequencing profile of thyroid cancer cell lines for DMBT1 variant.

| Cancer Cell type                | Cell line | D1657E status |
|---------------------------------|-----------|---------------|
| Papillary (PTC)                 | TPC-1     | wt/wt         |
| Follicular (FTC)                | FTC133    | wt/wt         |
| Medullary (MTC)                 | TT        | wt/wt         |
| Anaplastic (ATC)                | Cal62     | wt/wt         |
| Thyroid Squamous cell carcinoma | SW579     | wt/wt         |
